# Supplementary material for: Genome-wide mapping of TnrA-binding sites provides new insights into the TnrA regulon in Bacillus subtilis
Source: PubMed Central journal article supplement (PMC4475385; doi:10.1002/mbo3.249), 2015-03-08

## **Supplemental text for**

### **Genome-wide mapping of TnrA-binding sites provides new insights into the TnrA regulon in *Bacillus subtilis***

Nicolas Mirouze<sup>a,b</sup>, Elena Bidnenko<sup>a,b</sup>, Philippe Noirot<sup>a,b</sup>, Sandrine Auger<sup>a,b,1</sup>

<sup>a</sup> INRA, UMR1319 Micalis, F-78352 Jouy-en-Josas, France

<sup>b</sup> AgroParisTech, UMR Micalis, F-78352 Jouy-en-Josas, France

<sup>1</sup>Corresponding author: Sandrine Auger, Email: sandrine.auger@jouy.inra.fr.

## Supplemental Figures Legend.

### Figure S1. Direct involvement of TnrA as repressor in the control of *yuiA*, *yvgT*, *hom*, *pycA*, *pucl* and *yumC* expression.

Strains were cultivated in minimal medium with glutamate (left panels A, C, E, G, I and K ) or with glutamate + glutamine (right panels B, D, F, H, J and L) as nitrogen source. Growth ( $OD_{600nm}$ ) was monitored every 5 min: blue circles, wild-type; red circles,  $\Delta tnrA$ . Promoter activity (RLU/OD) of each transcriptional fusion with the *luc* reporter gene is indicated: blue lines, in the wild-type; red lines, in  $\Delta tnrA$  cells. Growth and promoter activity were followed for the 6 genes *yuiA*, *yvgT*, *hom*, *pycA*, *pucl* and *yumC*. For each strain, one representative curve, out of three independent replicates realized, is shown. Note that the X-axes are different for paired panels to get a better view of the data.

### Figure S2. Direct involvement of TnrA as activator in the control of *appD*, *dtpT*, *yrbD*, *pucR*, *ysnD*, *yfiR* and *pucA* expression.

Strains were cultivated in minimal medium with glutamate (left panels A, C, E, G, I, K and M ) or with glutamate + glutamine (right panels B, D, F, H, J, L and N) as nitrogen source. Growth ( $OD_{600nm}$ ) was monitored every 5 min: blue circles, wild-type; green circles,  $\Delta tnrA$ . Promoter activity (RLU/OD) of each transcriptional fusion with the *luc* reporter gene is indicated: blue lines, in the wild type; green lines, in  $\Delta tnrA$  cells. Growth and promoter activity were followed for the 7 genes *appD*, *dtpT*, *yrbD*, *pucR*, *ysnD*, *yfiR* and *pucA*. For each strain, one representative curve, out of three independent replicates realized, is shown. Note that the Y-axes are different for some paired panels to get a better view of the data.

**Figure S3. Alignment of TnrA box sequences from the TnrA primary and secondary regulon.**

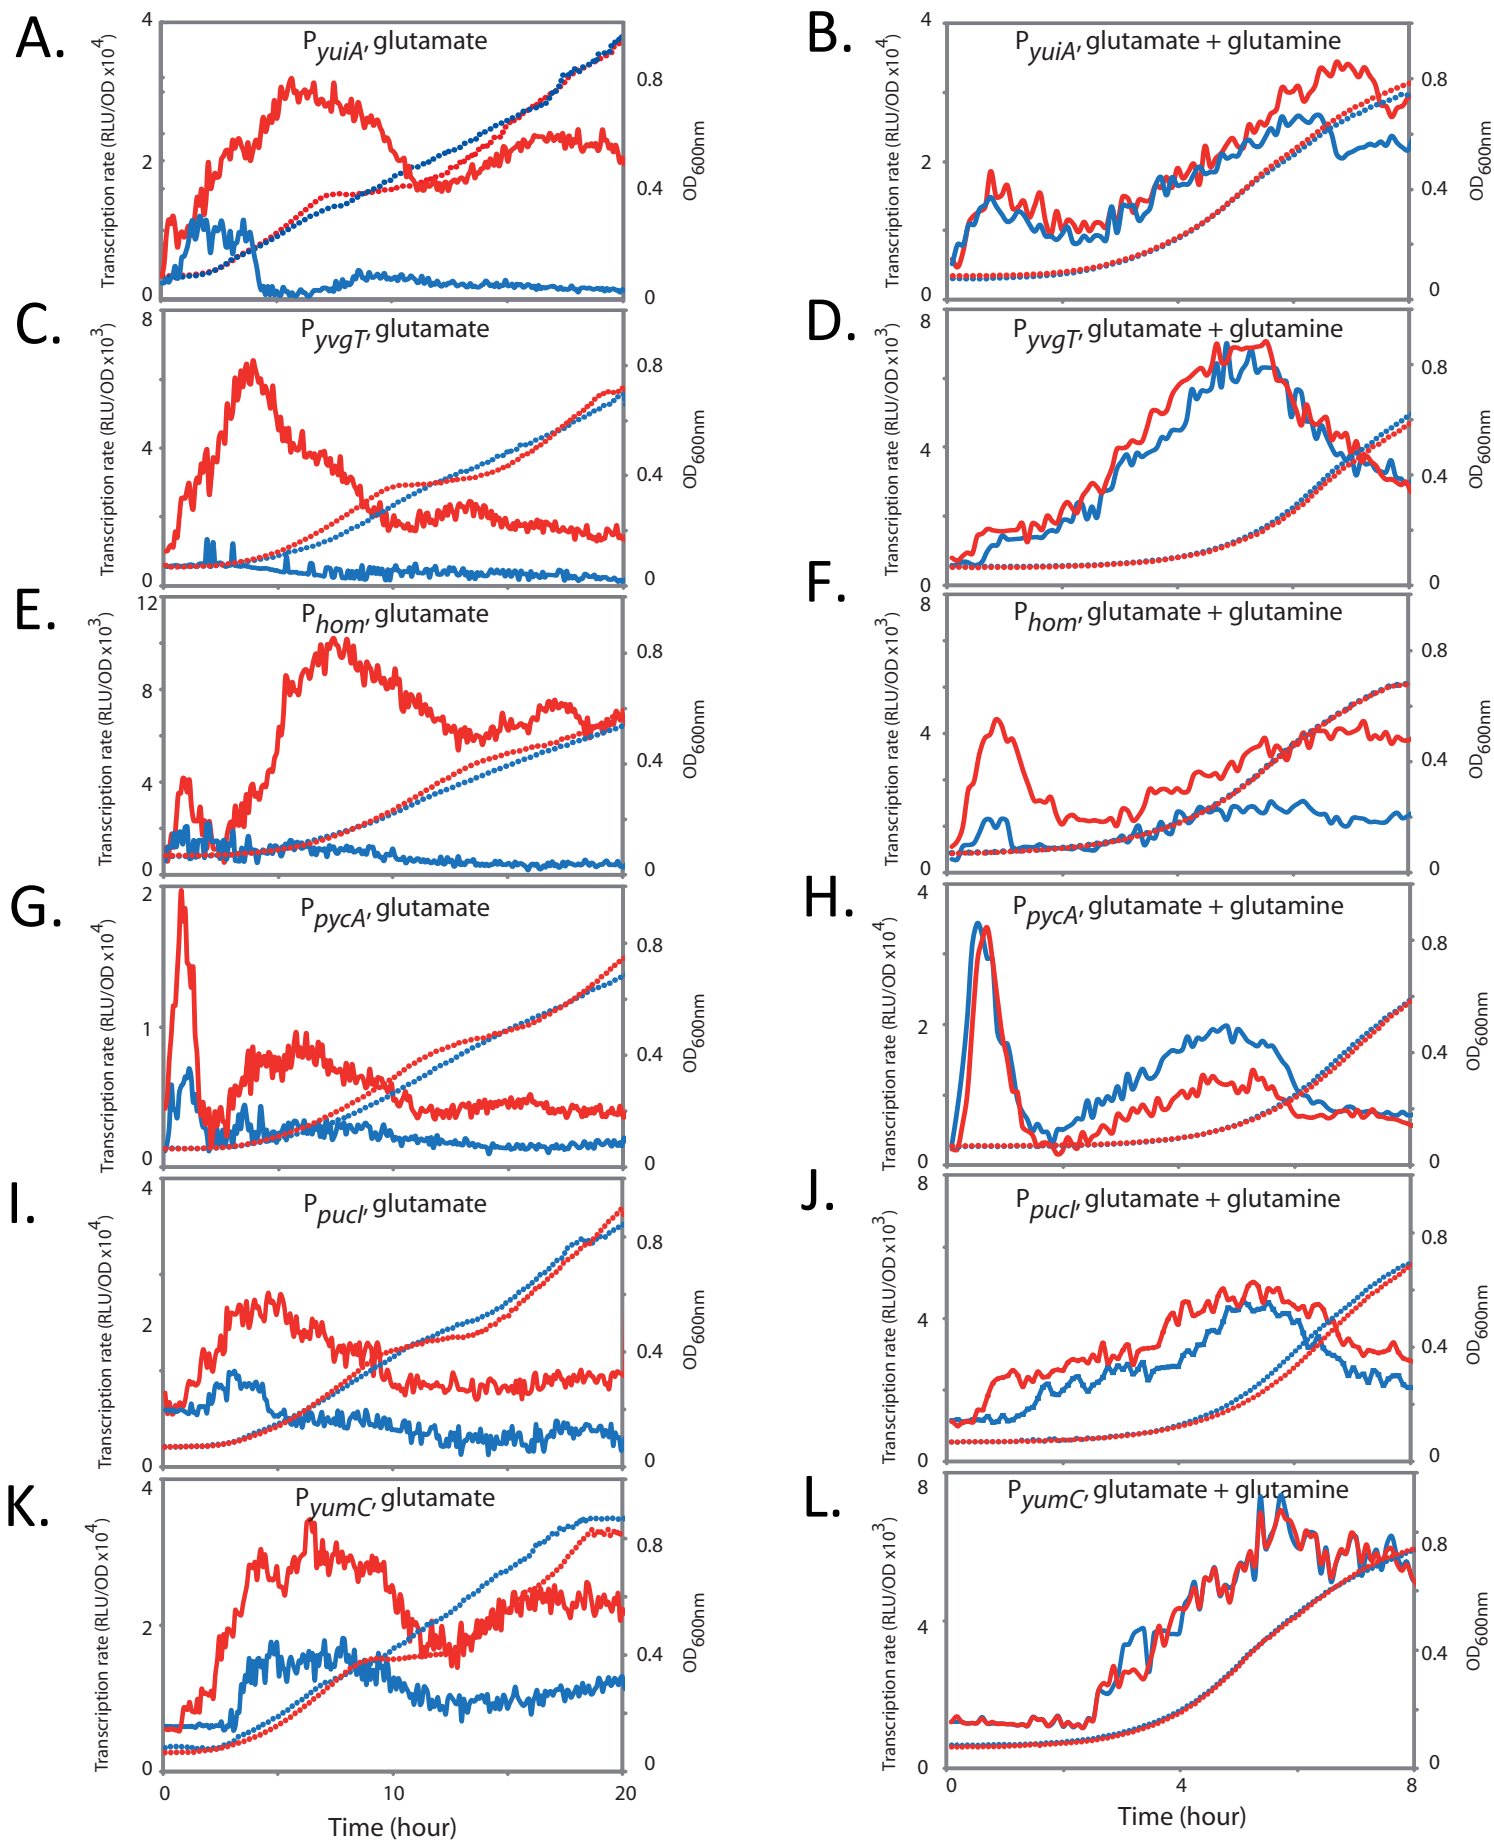

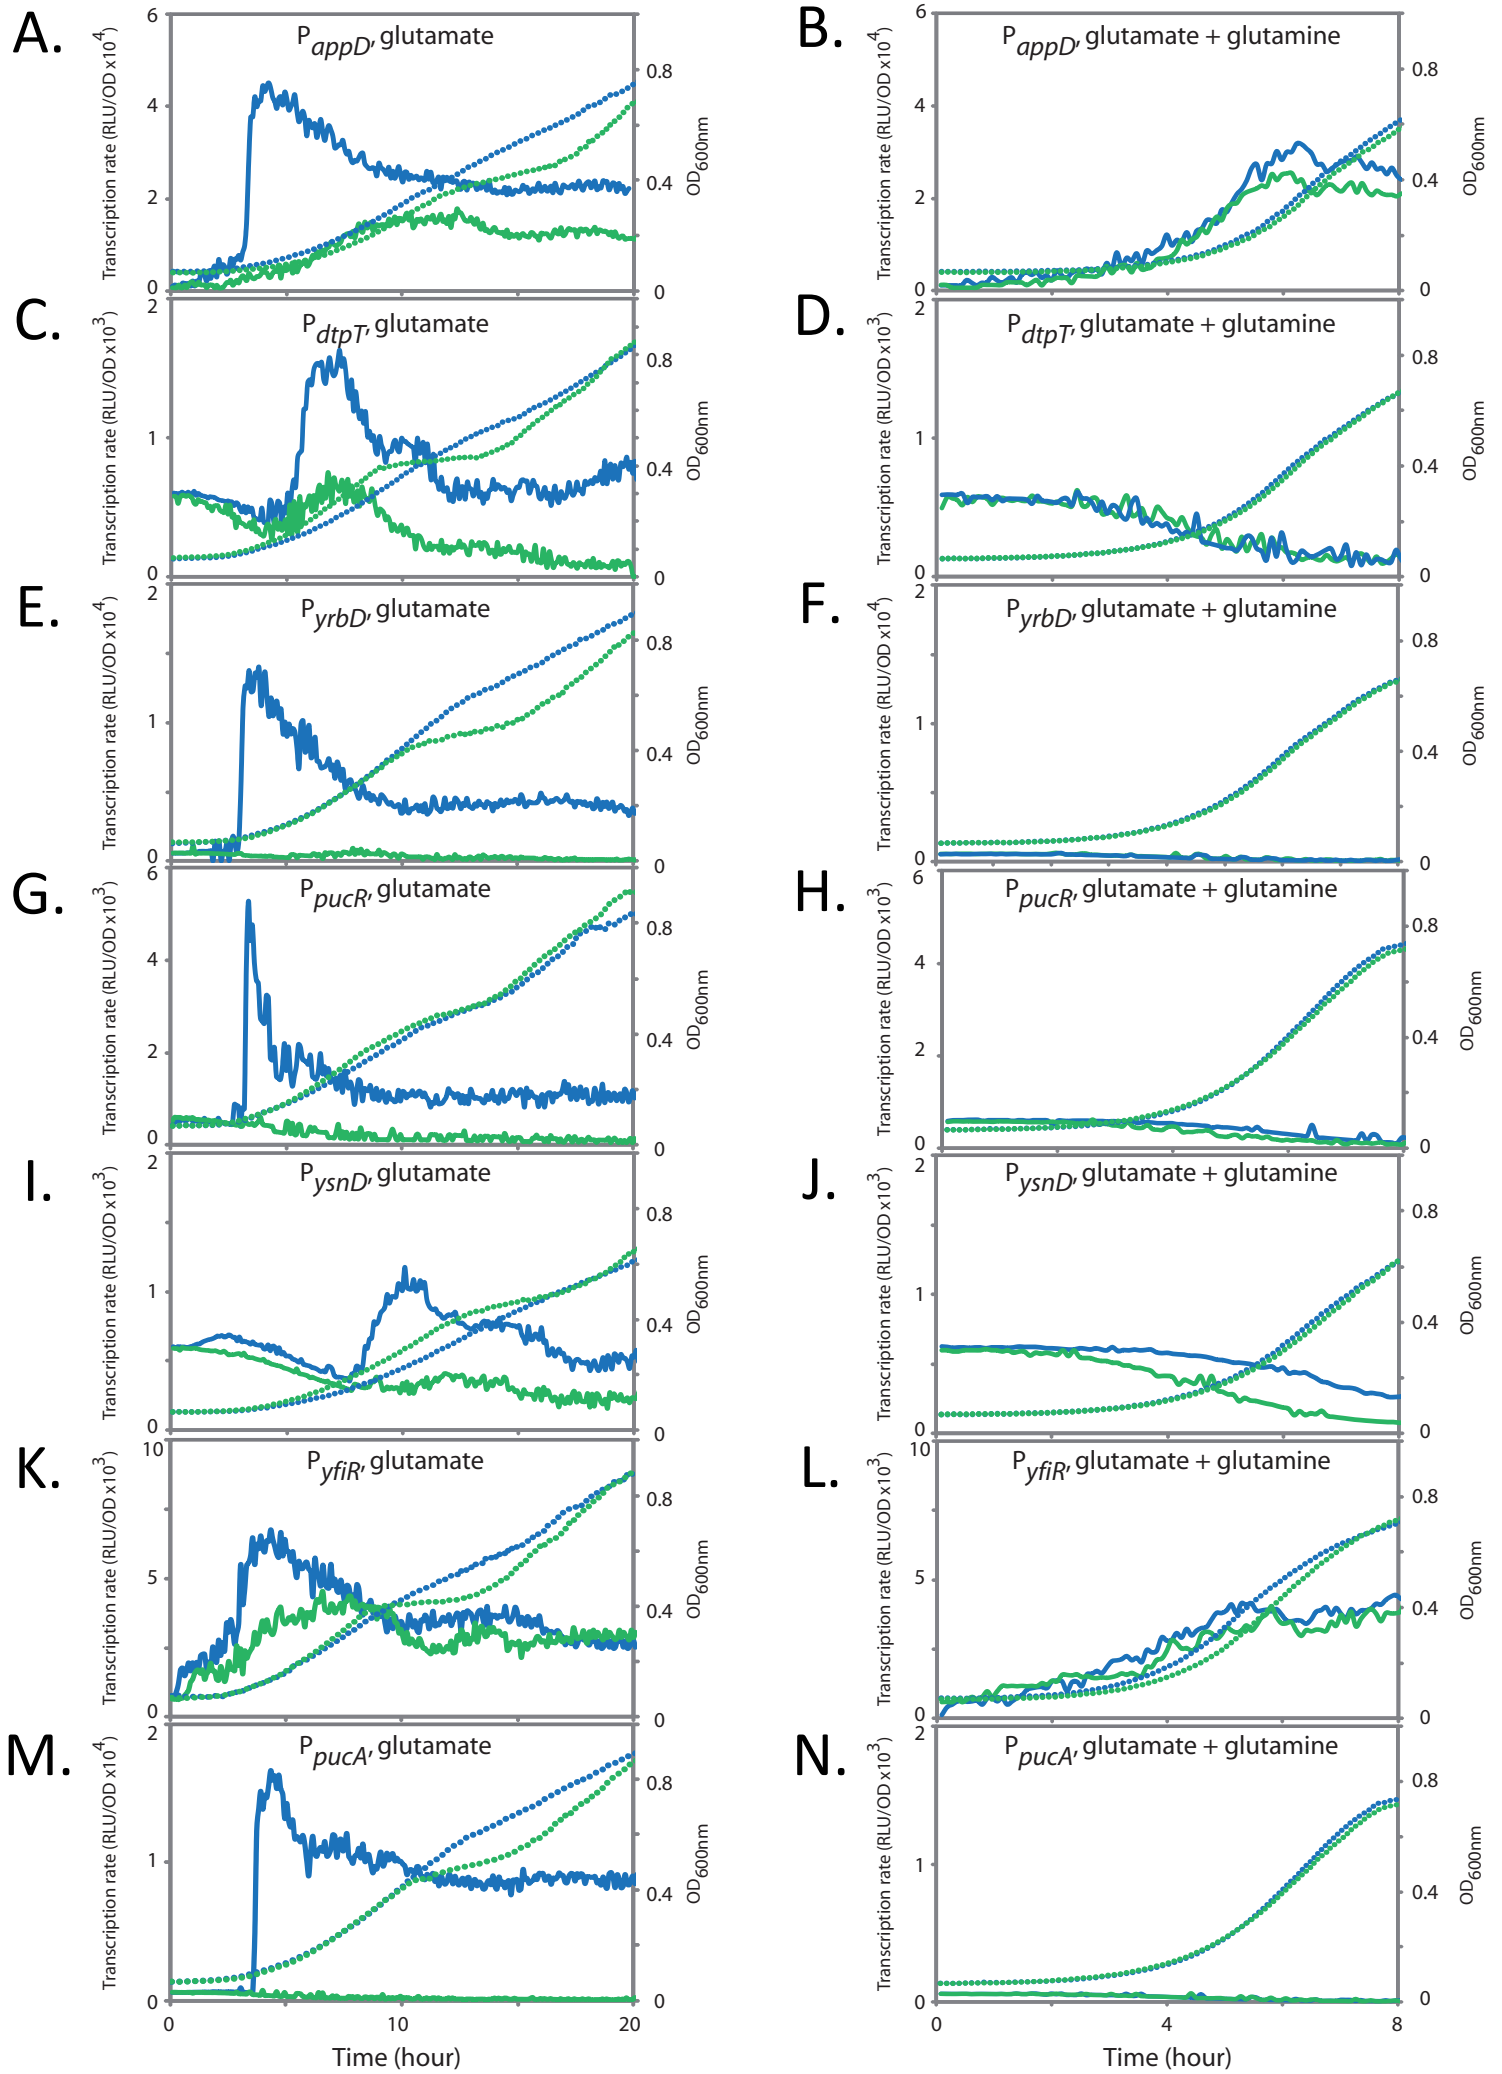

|             |     |      |                    |
|-------------|-----|------|--------------------|
| <i>glnQ</i> | (+) | -28  | GGTCAAATTTTCTGATA  |
| <i>nasA</i> | (-) | -82  | TGTAAGTTTTGTGACA   |
| <i>nasD</i> | (+) | -85  | TGTTACATTTTATAACA  |
| <i>nrgA</i> | (-) | -102 | TGTAAGATTTTCCTGACA |
| <i>oppA</i> | (-) | -231 | CGTTAGTTTTTCTTCCA  |
| <i>pucJ</i> | (+) | -140 | TGTTACATTTTCTTACA  |
| <i>tnrA</i> | (+) | -124 | TGTTAATTTTTCTTCCG  |
| <i>yzkB</i> | (-) | -87  | TGTTAATTTTTCTTCCG  |
| <i>ureA</i> | (-) | -938 | TGTTATATTTATTACACA |
| <i>ycsF</i> | (+) | -145 | TGGTAGGTTTTCTGACA  |
| <i>ycsF</i> | (-) | -52  | TGTCATTTATTGTCCCG  |
| <i>gabP</i> | (+) | -103 | TGGTATATTTCTTACA   |
| <i>yrbD</i> | (-) | -96  | TGTCACATTAATGACC   |
| <i>appD</i> | (-) | -119 | AGTTGTATATTATTACA  |
| <i>dtpT</i> | (+) | -212 | TCTAAAAATTTATTAAA  |
| <i>dtpT</i> | (-) | -175 | CGTGAGATTTTCTTACA  |
| <i>pucR</i> | (+) | -140 | TGTCAGTTTATGTAAACA |
| <i>ysnD</i> | (+) | -141 | TGGAAGATTTTATAACA  |
| <i>ysnD</i> | (+) | -97  | TGACAGATCATCTTGCA  |
| <i>ywrD</i> | (+) | -83  | CGTCACTTTTTCTGCCG  |
| <i>glnR</i> | (+) | -82  | TGTTAAGAAATCCTTACA |
| <i>glnR</i> | (-) | -59  | TGTTATAATTAATGTGCA |
| <i>gltA</i> | (+) | -51  | TGTTAGATTTTATGACC  |
| <i>ilvB</i> | (-) | -736 | TGACAGATCATCTTGCA  |
| <i>ilvB</i> | (-) | -692 | TGGAAGATTTTATAACA  |
| <i>pel</i>  | (+) | -27  | TGTGAGATTTTATTCCA  |
| <i>yoyD</i> | (+) | -61  | TGTGATCTTTTCTTACA  |
| <i>ywdI</i> | (-) | -92  | TGTTATTTTTTCTGACA  |
| <i>yycC</i> | (+) | -66  | TGTGACATCTTCTTACA  |
| <i>yttA</i> | (-) | -69  | TGTTAGATTTTTTTCACG |
| <i>ywlF</i> | (-) | -154 | TTGCAGATTTTCTGACA  |
| <i>alsT</i> | (-) | -61  | TGTTAGATTTTTTAAACA |
| <i>degU</i> | (-) | -159 | TGTCATCGTTCCTTCCA  |
| <i>yuiA</i> | (-) | -78  | AGTCAGATCATGTGACA  |
| <i>yvgT</i> | (-) | -39  | TGTTAAATTTTCTGACG  |
| <i>yfiR</i> | (-) | -31  | TCTGCAATTTTCTTACC  |
| <i>hom</i>  | (-) | -203 | AGTCAGATTTTCTCCTC  |
| <i>pycA</i> | (+) | -87  | TGTTTATCTGTAAAAAA  |
| <i>braB</i> | (-) | -55  | TGTTAGATTTTCTTCCCT |
| <i>ydaB</i> | (-) | -55  | TGTTAGATTTTCTTCCCT |
| <i>yfll</i> | (+) | -345 | CGTCAGATTTTCTCCAA  |
| <i>ykkC</i> | (-) | -243 | TGTAAGATTTTCTTTTCA |
| <i>ypqP</i> | (-) | +20  | AAACAGCTTTTTCAGATA |
| <i>yugK</i> | (-) | -45  | AAACAGATTTTCCATTG  |
| <i>kamA</i> | (+) | +168 | CGTCAGAAATTTCTACCA |
| <i>ykoH</i> | (-) | +330 | CGTCAGGTTTCTCACAA  |

TnrA primary regulon

TnrA secondary regulon

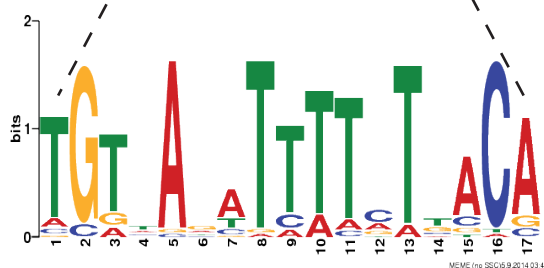

Supplement: mbo30004-0423-sd1.pdf [file mbo30004-0423-sd1.pdf]
